# Supplementary material for: Evolution of a horizontally acquired legume gene, albumin 1, in the parasitic plant Phelipanche aegyptiaca and related species
Source: PubMed Central journal article supplement (PMC3601976; doi:10.1186/1471-2148-13-48), 2013-02-20
Supplement: 1471-2148-13-48-S2.pdf [file 1471-2148-13-48-S2.pdf]

## A

> [emb|CAE00461.1](#) albumin 1 [Medicago truncatula]  
Length=140

Score = 166 bits (419), Expect = 5e-51, Method: Compositional matrix adjust.  
Identities = 81/144 (56%), Positives = 99/144 (69%), Gaps = 13/144 (9%)

```
Query 4 YVKLSPLALFLLATVFLMSPIKKAEMATDCSGVCSPFEMPPCGSTDCRCVPLGLFFGQCIY 63
      Y++ + L +FLLA F + P KK ATDCSG CSPFEMPPC S+DCRC+P+GL G C Y
Sbjct 3 YIRFAHLVVFLLA-AFSLVPTKKVGATDCSGACSPFEMPPCRSSDCRCIPIGLVAGYCTY 61

Query 64 PTSVEMNKMVDEHNNLCKSHDDCMKKGSGSFCARYPNADIEYGWCFASDSEAQDMLKIAS 123
      P+S + KMV+EH NLC+SH DC KK SGSFCARYPN DIE+GWCF+S+ EA D+
Sbjct 62 PSSPTVMKMVEEHPNLCQSHADCTKKESGSGSFCARYPNPDIEHGWCFSNFEAYDV----- 116

Query 124 NSEFTKTFLRIASNSGLAKSFLKM 147
      F ++SN GL K L M
Sbjct 117 -----PFNVSSNRGLIKDSLPM 133
```

## B

> [ref|XP\\_003627383.1](#)  Albumin [Medicago truncatula]

[gb|AET01859.1](#)  Albumin [Medicago truncatula]  
Length=145

[GENE ID: 11420704 MTR 8g022400](#) | Albumin [Medicago truncatula]

Score = 160 bits (404), Expect = 1e-48, Method: Compositional matrix adjust.  
Identities = 77/127 (61%), Positives = 96/127 (76%), Gaps = 2/127 (2%)

```
Query 4 YVKLSPLALFLLATLFFMSPMKKADAADCSGVCSPFEMPPCGSTDCRCVPWGLFVGQCIY 63
      Y++L+ L +FLLAT + PM KA A DC G+CSPFEMPPC S+ CRC+P L G C+
Sbjct 3 YLRLAHLVVFLLATFSLIFPMMKA-AEDCLGICSPFEMPPCPSSSCRCIPVILIGGNCVD 61

Query 64 PTSVVMHKMVGEHNNLCKSHDDCMKKGSGSFCARYPNADIEYGWCFASVSDAQDM-FKIA 122
      P+S + KMV +H NLC+SH DC KKGSGSFCARYPN DIEYGWCF+S S AQ++ F+I+
Sbjct 62 PSSPTITKMVEKHANLCQSHADCTKKGSGSFCARYPNPDIEYGWCFSSSSRAQEVFFEIS 121

Query 123 SNSEFTK 129
      SN +F K
Sbjct 122 SNPQFIK 128
```
