# Supplementary material for: Evolution of a horizontally acquired legume gene, albumin 1, in the parasitic plant Phelipanche aegyptiaca and related species
Source: PubMed Central journal article supplement (PMC3601976; doi:10.1186/1471-2148-13-48), 2013-02-20

signal peptide

mature peptide

**A**

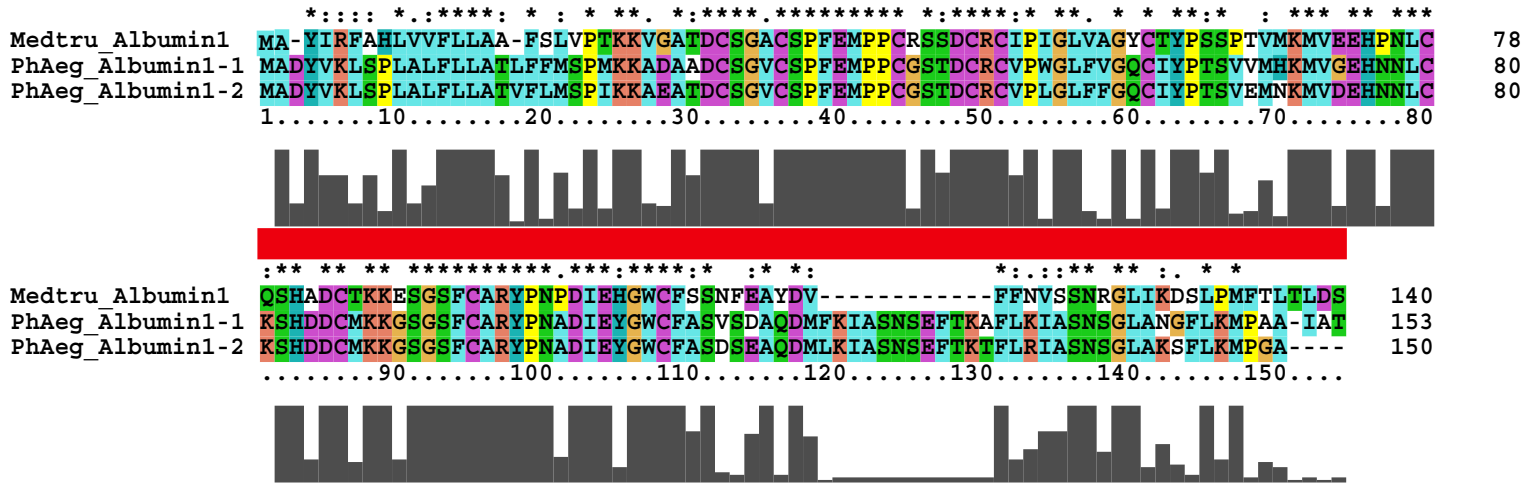

**B**

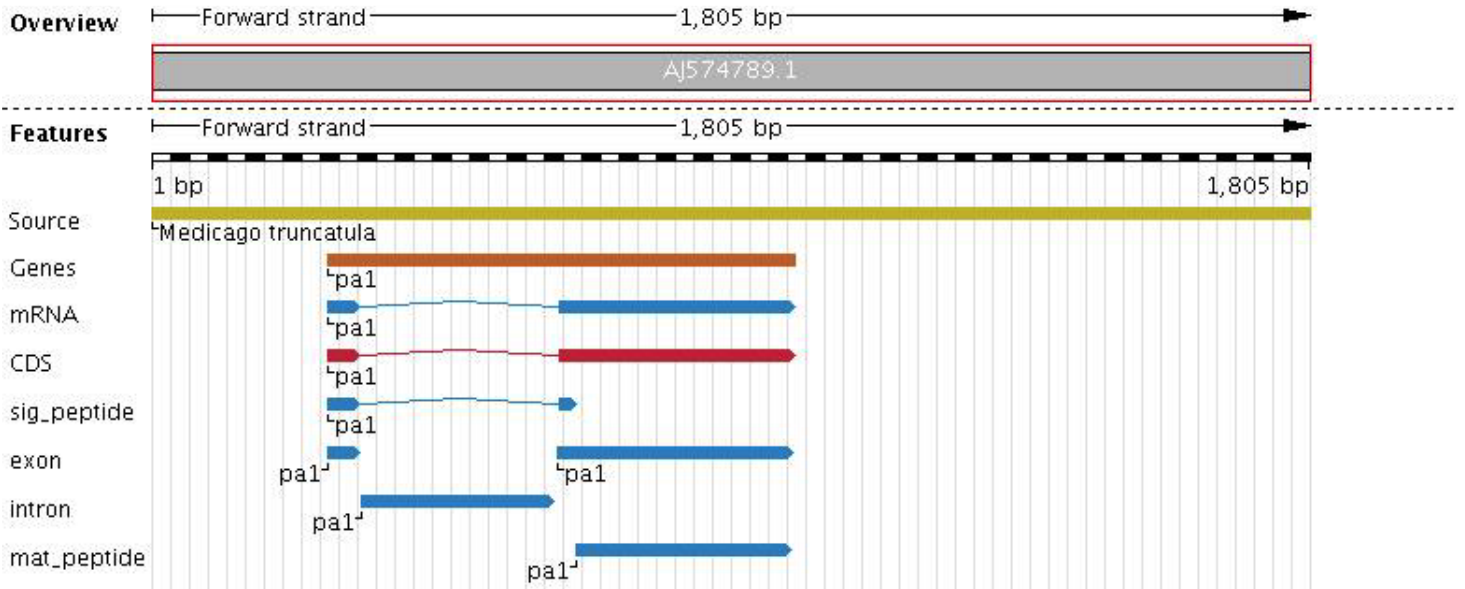

Supplement: 1471-2148-13-48-S3.pdf [file 1471-2148-13-48-S3.pdf]
