# Supplementary material for: Evolution of a horizontally acquired legume gene, albumin 1, in the parasitic plant Phelipanche aegyptiaca and related species
Source: PubMed Central journal article supplement (PMC3601976; doi:10.1186/1471-2148-13-48), 2013-02-20
Supplement: 1471-2148-13-48-S8.pdf [file 1471-2148-13-48-S8.pdf]

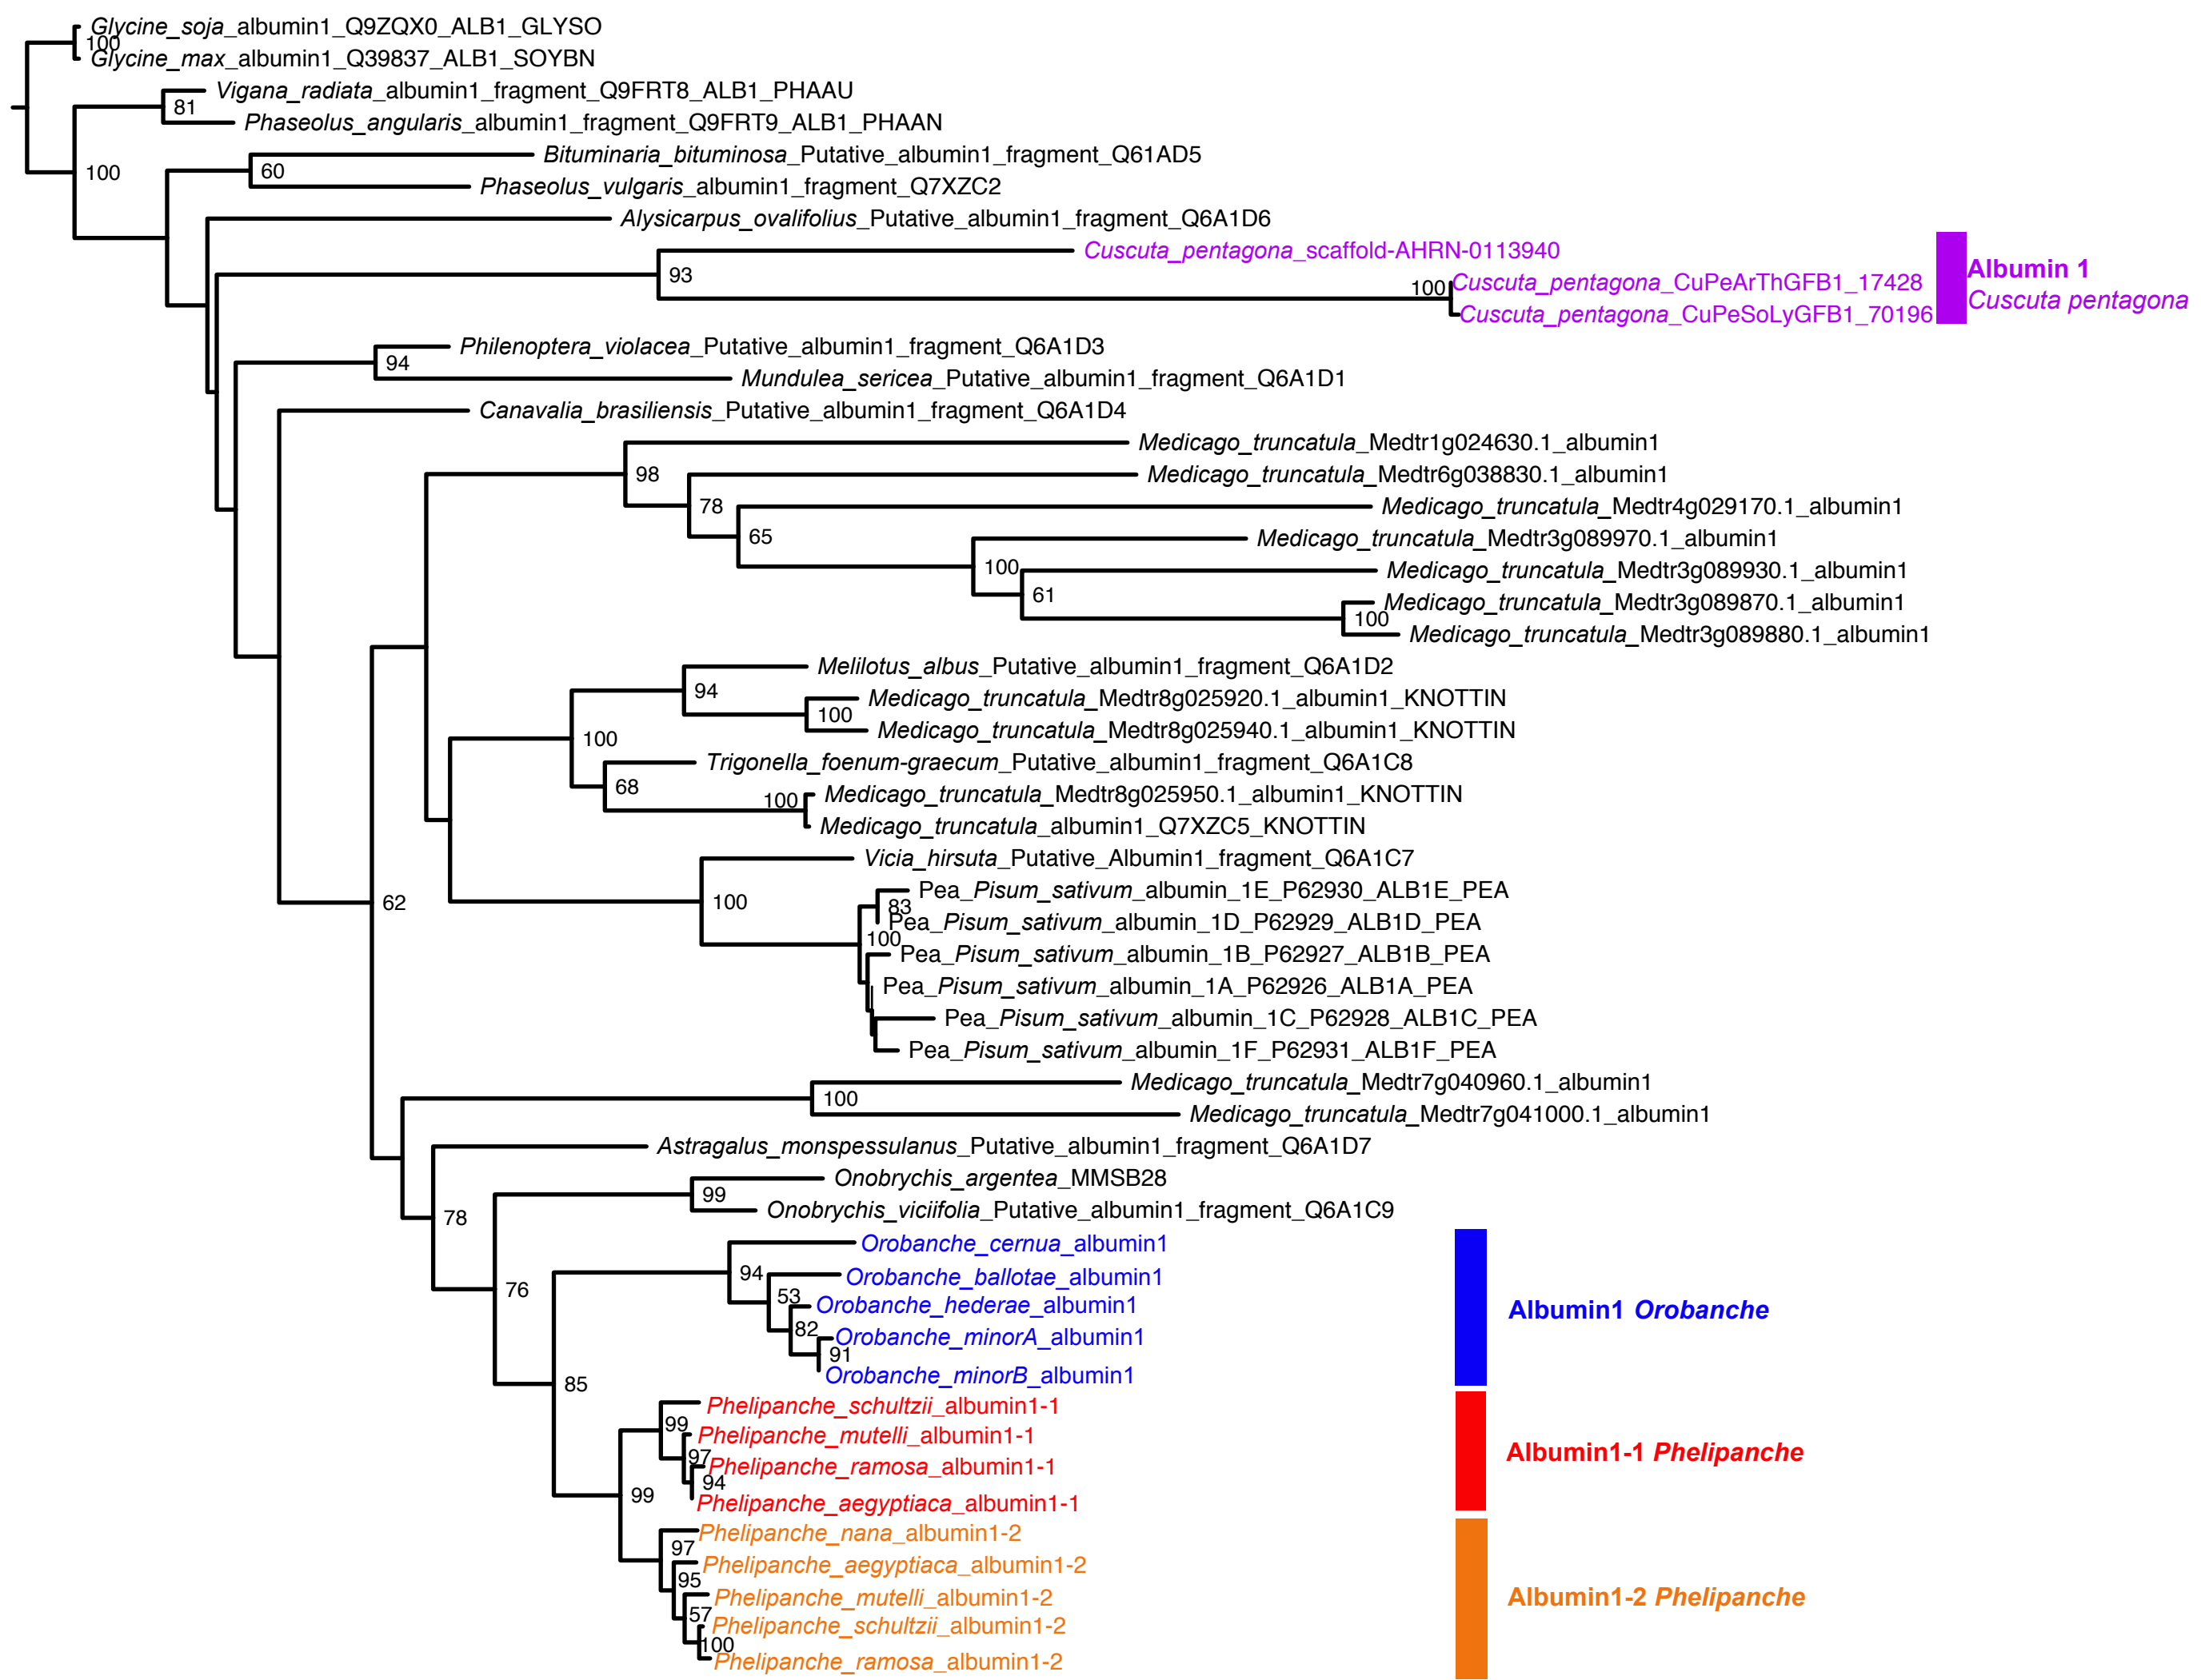

0.2
